# Supplementary material for: Public Health Literacy, Knowledge, and Awareness Regarding Antibiotic Use and Antimicrobial Resistance during the COVID-19 Pandemic: A Cross-Sectional Study
Source: Antibiotics (Basel). 2021 Sep 13;10(9):1107. doi: 10.3390/antibiotics10091107 (PMC8472776; doi:10.3390/antibiotics10091107)
Supplement: Supplementary file 1 [file antibiotics-10-01107-s001.zip › antibiotics-1335070-supplementary.pdf]

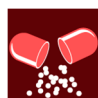

**Table S1.** Simple logistic regression of sociodemographic factors and levels of health literacy associated with participants' knowledge of antibiotics and antibiotic resistance.

|                                                  | Knowledge of Antibiotics<br>(Adequate VS Inadequate) |         | Knowledge of Antibiotic<br>Resistance<br>(Adequate VS Inadequate) |         |
|--------------------------------------------------|------------------------------------------------------|---------|-------------------------------------------------------------------|---------|
|                                                  | OR (95% CI)                                          | P-Value | OR (95% CI)                                                       | P-Value |
| <b>Age</b>                                       |                                                      |         |                                                                   |         |
| 18-24                                            | 2.94 (1.96-4.34)                                     | 0.000   | 1.02(0.69-1.49)                                                   | 0.913   |
| 25-34                                            | 1.56 (1.07-2.27)                                     | 0.024   | 1.34(0.93-1.91)                                                   | 0.107   |
| 35-44                                            | 1.15 (0.77-1.69)                                     | 0.521   | 1.44(0.99-2.09)                                                   | 0.051   |
| > 45 (Ref.)                                      | 1                                                    |         | 1                                                                 |         |
| <b>Gender</b>                                    |                                                      |         |                                                                   |         |
| Male                                             | 0.79 (0.61-1.01)                                     | 0.069   | 0.98(0.77-1.26)                                                   | 0.929   |
| Female (Ref.)                                    | 1                                                    |         | 1                                                                 |         |
| <b>Area of Living</b>                            |                                                      |         |                                                                   |         |
| Urban                                            | 1.63 (1.21-2.2)                                      | 0.001   | 1.14(0.85-1.54)                                                   | 0.361   |
| Suburban                                         | 0.99 (0.69-1.42)                                     | 0.981   | 0.98(0.68-1.41)                                                   | 0.928   |
| Rural                                            | 1                                                    |         | 1                                                                 |         |
| <b>Family Structure</b>                          |                                                      |         |                                                                   |         |
| Nuclear family                                   | 0.93 (0.7-1.24)                                      | 0.657   | 1.17(0.89-1.55)                                                   | 0.252   |
| Joint family                                     | 0.83 (0.6-1.14)                                      | 0.263   | 0.94(0.69-1.30)                                                   | 0.746   |
| Extended family (Ref.)                           | 1                                                    |         | 1                                                                 |         |
| <b>Educational Level</b>                         |                                                      |         |                                                                   |         |
| Postgraduate degree                              | 1.42 (1.01-2)                                        | 0.042   | 2.04 (1.45-2.88)                                                  | 0.000   |
| Bachelor's degree                                | 1.25 (0.94-1.68)                                     | 0.122   | 1.64(1.22-2.19)                                                   | 0.001   |
| Up to High School (Ref.)                         | 1                                                    |         | 1                                                                 |         |
| <b>Employment Status</b>                         |                                                      |         |                                                                   |         |
| Employed in medical field                        | 3.88 (2.82-5.33)                                     | 0.000   | 3.79 (2.8-5.12)                                                   | 0.000   |
| Employed in non-medical field                    | 1.13 (0.86-1.48)                                     | 0.362   | 1.13(0.86-1.48)                                                   | 0.369   |
| Unemployed (Ref.)                                | 1                                                    |         | 1                                                                 |         |
| <b>Total Family Income</b>                       |                                                      |         |                                                                   |         |
| Above JOD 1,500                                  | 1.89 (1.22-2.93)                                     | 0.004   | 2.06(1.35-3.14)                                                   | 0.001   |
| JOD 1,001-JOD 1,500                              | 1.61(1.08-2.38)                                      | 0.018   | 2.02(1.37-2.97)                                                   | 0.000   |
| JOD 501-JOD 1,000                                | 1.19 (0.92-1.55)                                     | 0.179   | 1.56(1.2-2.03)                                                    | 0.001   |
| Less than JOD 500 (Ref.)                         | 1                                                    |         | 1                                                                 |         |
| <b>Do You Have Health Insurance</b>              |                                                      |         |                                                                   |         |
| Yes                                              | 1.44 (1.1-1.89)                                      | 0.007   | 1.77(1.35-2.32)                                                   | 0.000   |
| No (Ref.)                                        | 1                                                    |         | 1                                                                 |         |
| <b>Have you ever infected with COVID-19</b>      |                                                      |         |                                                                   |         |
| Yes                                              | 1.03 (0.81-1.3)                                      | 0.81    | 1.77(1.35-2.32)                                                   | 0.000   |
| No (Ref.)                                        | 1                                                    |         | 1                                                                 |         |
| <b>Protect yourself and others from COVID-19</b> |                                                      |         |                                                                   |         |
| Received Antibiotics?                            |                                                      |         |                                                                   |         |
| Yes (n=250, 20.6%)                               | 0.32 (0.227-0.45)                                    | 0.000   | 0.65(0.47-0.91)                                                   | 0.009   |
| No (Ref.)                                        | 1                                                    |         | 1                                                                 |         |
| Social distancing and wearing facemask?          |                                                      |         |                                                                   |         |
|                                                  | 0.84 (0.66-1.06)                                     | 0.154   | 0.94(0.61-1.45)                                                   | 0.779   |

|                                                    |                  |       |                 |       |
|----------------------------------------------------|------------------|-------|-----------------|-------|
| Yes (n=490, 40.4%)                                 |                  |       |                 |       |
| No (Ref.)                                          | 1                |       | 1               |       |
| Registered my name to receive<br>COVID-19 vaccine? |                  |       |                 |       |
| Yes (n= 463, 38.2%)                                | 0.78 (0.62-0.99) | 0.039 | 0.98(0.78-1.25) | 0.92  |
| No (Ref.)                                          | 1                |       | 1               |       |
| Received COVID-19 Vaccine?                         |                  |       |                 |       |
| Yes (n=377, 31.1%)                                 | 2.18 (1.7-2.86)  | 0.000 | 1.54(1.21-1.97) | 0.001 |
| No (Ref.)                                          | 1                |       | 1               |       |
| <b>Health Literacy</b>                             |                  |       |                 |       |
| Adequate (n= 759, 62.6%)                           | 1.73 (1.36-2.19) | 0.003 | 1.79(1.41-2.26) | 0.000 |
| Inadequate (Ref.)                                  | 1                |       | 1               |       |
